# Supplementary material for: Theoretical investigation to predict physicochemical performances and evaluate comprehensive properties of a novel CL-20/LLM-116 cocrystal explosive: a molecular dynamics (MD) study
Source: Royal Society of Chemistry journal article supplement (doi:10.1039/d5ce00928f), 2025-12-02
Supplement: d5ce00928f1.pdf [file d5ce00928f1.pdf]

## Supporting Information

The empirical nitrogen equivalent equation is illustrated as follows:

$$\begin{cases} D = (690 + 1160\rho) \sum N_{\text{ch}} \\ p = 1.106 \left( \rho \sum N_{\text{ch}} \right)^2 - 0.84 \\ \sum N_{\text{ch}} = \frac{100}{M_r} \left( p_i N_{p_i} + \sum B_K N_{B_K} + \sum G_j N_{G_j} \right) \end{cases}$$

$D$ : detonation velocity (m/s)

$p$ : detonation pressure (GPa)

$\rho$ : crystal density of energetic material (g/cm<sup>3</sup>)

$\sum N_{\text{ch}}$ : the total value of nitrogen equivalent coefficient of energetic material

$M_r$ : the molar mass of energetic material

$p_i$ : the total number of  $i$ th detonation product with 1 mol explosive exploded completely

$N_{p_i}$ : the total nitrogen equivalent coefficient of  $i$ th detonation product

$B_K$ : the total number of  $K$ th chemical bond contained in explosive molecule

$N_{B_K}$ : the total nitrogen equivalent coefficient of  $K$ th chemical bond

$G_j$ : the total number of  $j$ th chemical groups contained in explosive molecule

$N_{G_j}$ : the total nitrogen equivalent coefficient of the  $j$ th chemical group.

Nitrogen equivalent coefficient for different detonation products

| Detonation product              | CO <sub>2</sub> | CO    | C     | H <sub>2</sub> O | N <sub>2</sub> |
|---------------------------------|-----------------|-------|-------|------------------|----------------|
| Nitrogen equivalent coefficient | 1.279           | 0.723 | 0.149 | 0.626            | 0.981          |

Nitrogen equivalent coefficient for different chemical bonds

| Chemical bond                   | C—C    | C—H     | C=C     | C—N     |
|---------------------------------|--------|---------|---------|---------|
| Nitrogen equivalent coefficient | 0.0628 | -0.0124 | 0.0345  | 0.0090  |
| Chemical bond                   | N—N    | N—H     | N≡O     | C=N     |
| Nitrogen equivalent coefficient | 0.0321 | -0.0578 | -0.0023 | -0.0077 |

Nitrogen equivalent coefficient for different chemical groups

| Chemical group                  | C—NO <sub>2</sub> | N—NO <sub>2</sub> |
|---------------------------------|-------------------|-------------------|
| Nitrogen equivalent coefficient | 0.0016            | -0.0028           |

The detonation equation of CL-20 ( $\text{C}_6\text{H}_6\text{O}_{12}\text{N}_{12}$ ) and LLM-116 ( $\text{C}_3\text{H}_3\text{O}_4\text{N}_5$ ) was illustrated as follows:

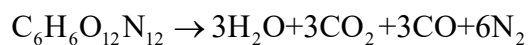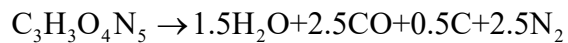

The molar mass of CL-20 ( $\text{C}_6\text{H}_6\text{O}_{12}\text{N}_{12}$ ) and LLM-116 ( $\text{C}_3\text{H}_3\text{O}_4\text{N}_5$ ) was illustrated as that:

$$M_r(\text{CL-20}) = 6 \times 12 + 6 \times 1 + 12 \times 16 + 12 \times 14 = 438$$

$$M_r(\text{LLM-116}) = 3 \times 12 + 3 \times 1 + 4 \times 16 + 5 \times 14 = 173$$
